# Supplementary figures and images for: Microrespirometric assessment of the metal–organic framework [Co2(btec)(bipy)(DMF)2]n (“MOF-Co”) to prevent inhibition by arsenic in activated sludge
Source: Royal Society of Chemistry journal article supplement (doi:10.1039/c9ew00967a), 2020-01-01

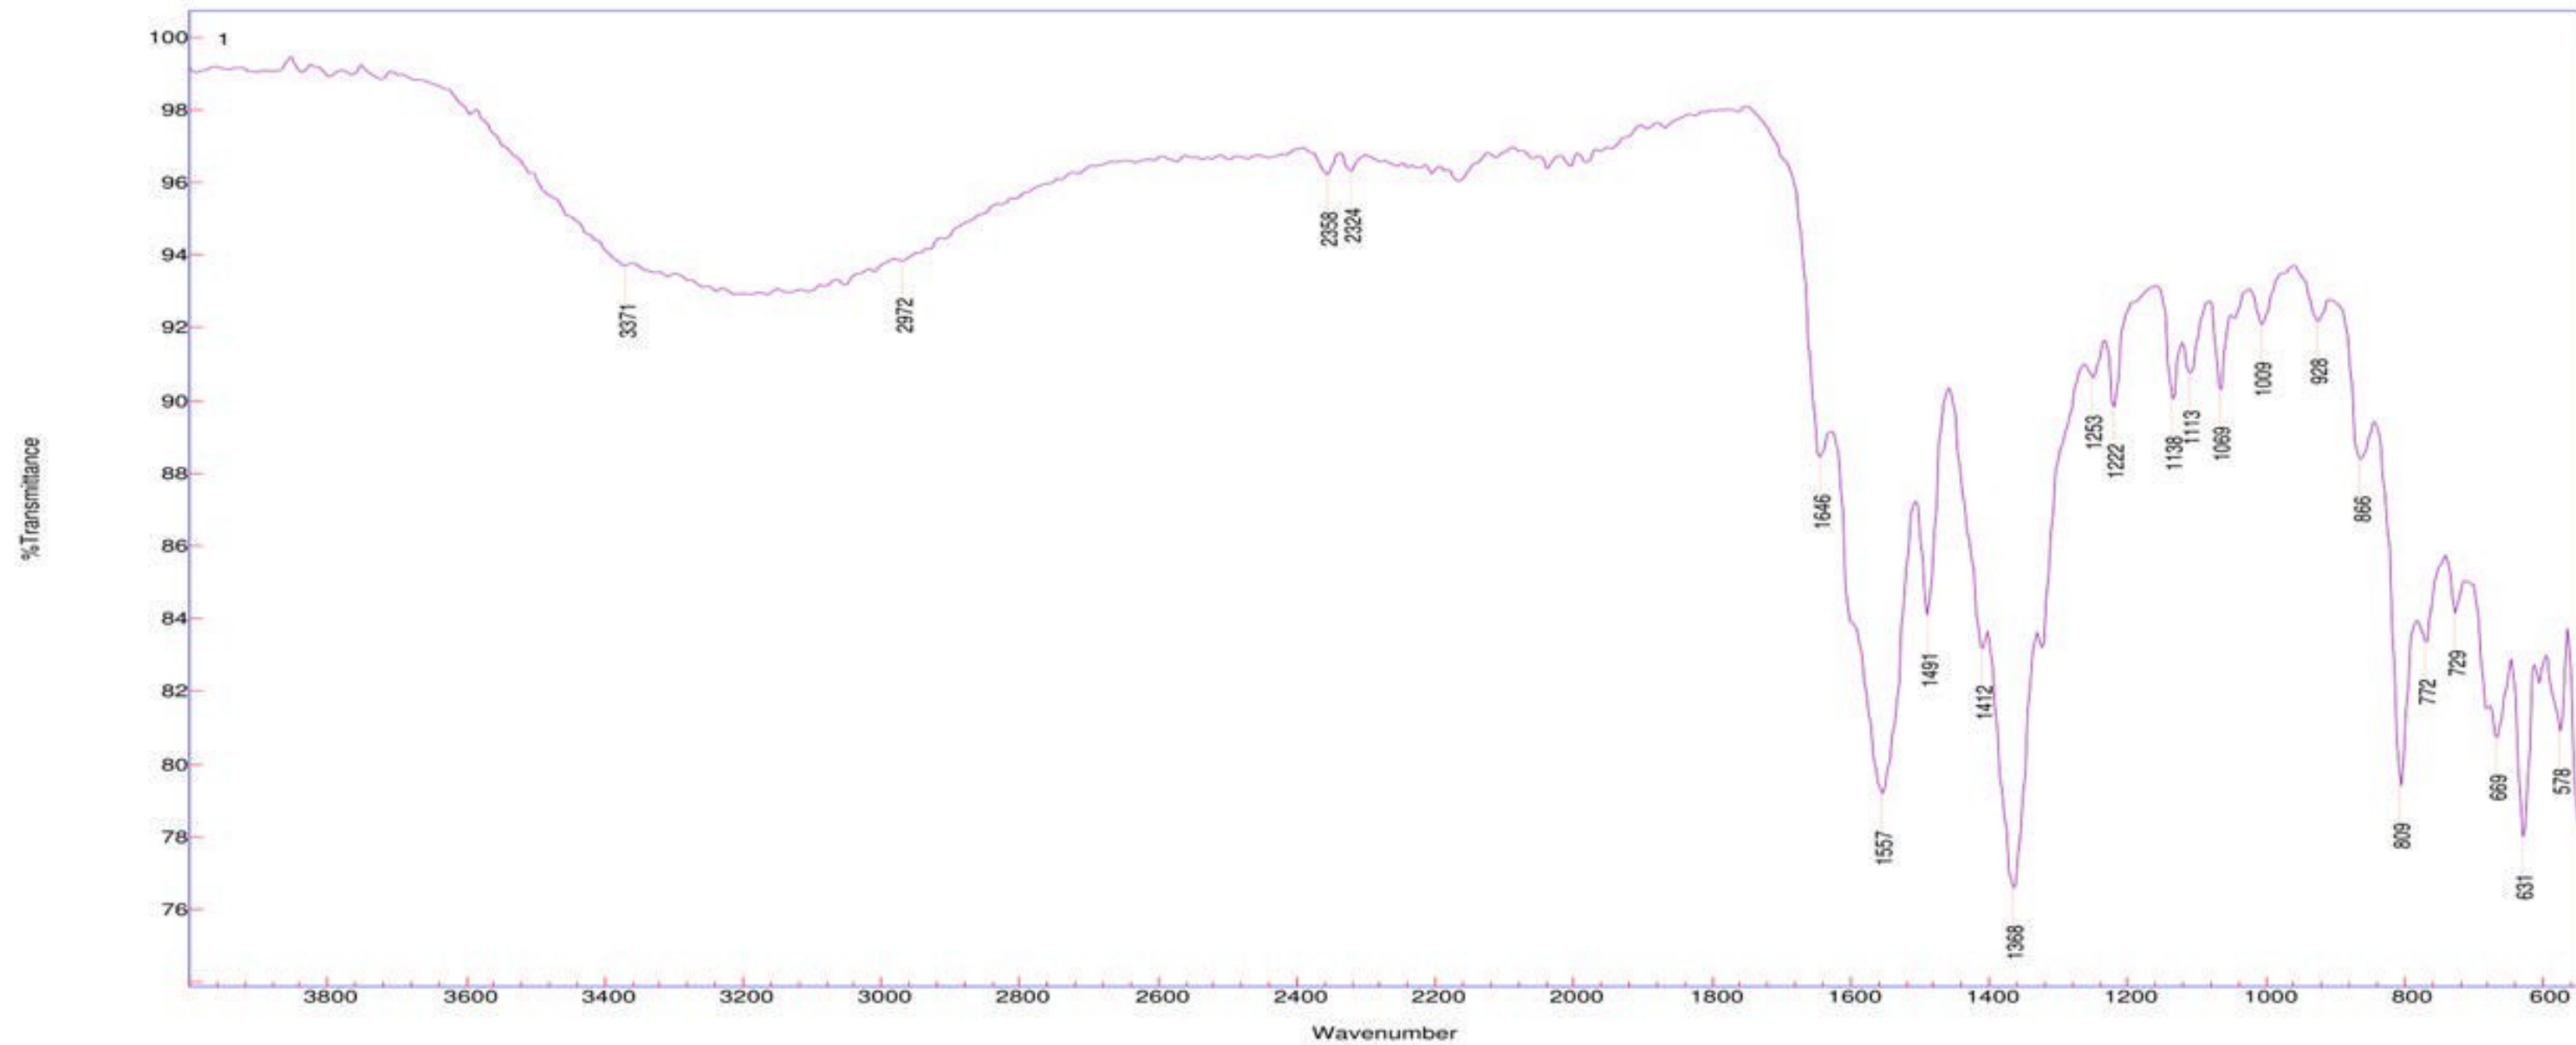

Supplement: c9ew00967a2.pdf [file c9ew00967a2.pdf]

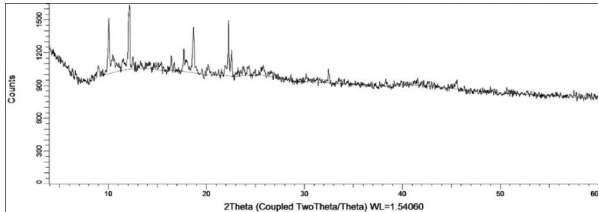

Supplement: c9ew00967a3.pdf [file c9ew00967a3.pdf]

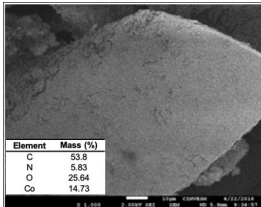

Supplement: c9ew00967a4.pdf [file c9ew00967a4.pdf]

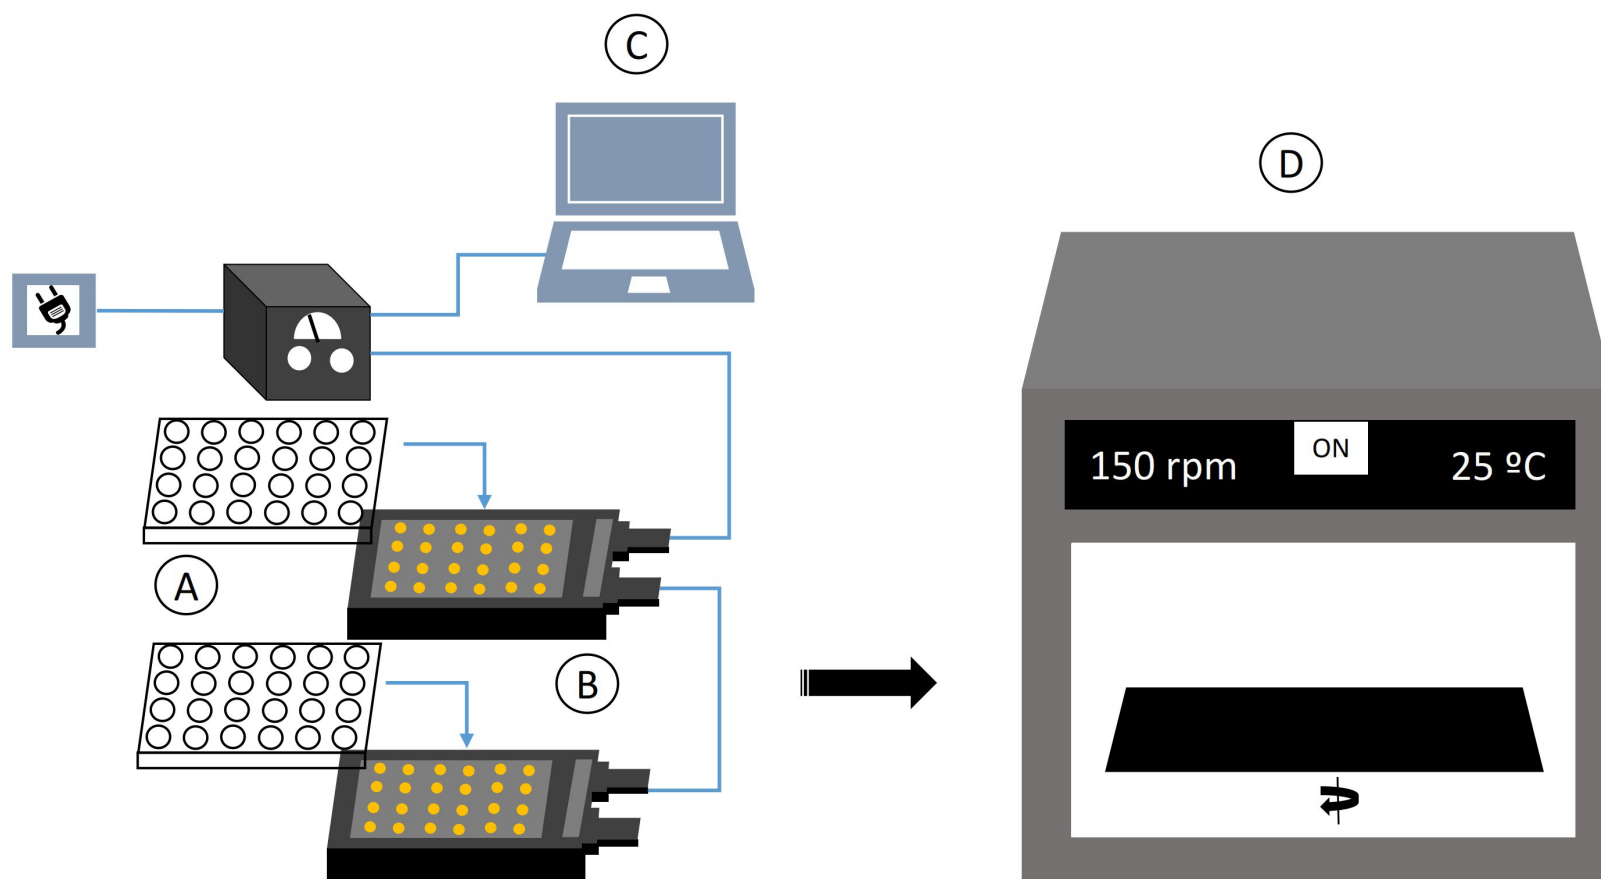

Supplement: c9ew00967a5.pdf [file c9ew00967a5.pdf]
